# Supplementary material for: Modulating the electronic structure of ion phthalocyanine-based molecular catalysts for electrocatalytic nitrogen reduction: a DFT study
Source: Royal Society of Chemistry journal article supplement (doi:10.1039/d4cp01373e), 2024-01-01
Supplement: d4cp01373e1.pdf [file d4cp01373e1.pdf]

Electronic Supplementary material (ESI) for Physical Chemistry Chemical Physics.

## **Regulating Molecular Structure of Phthalocyanine-based Catalysts for High-Efficiency Nitrogen Reduction: A DFT Study**

*Ze-Yuan Wu,<sup>a,b</sup> Jiaju Fu<sup>a</sup> and Jin-Song Hu,<sup>\*a,b</sup>*

*<sup>a</sup>Beijing National Laboratory for Molecular Sciences (BNLMS), CAS Key Laboratory  
of Molecular Nanostructure and Nanotechnology, Institute of Chemistry, Chinese  
Academy of Sciences (CAS), Beijing 100190, China*

*<sup>b</sup>University of Chinese Academy of Sciences, Beijing 100049, China.*

**Table S1.** Summary of calculated results for all Phthalocyanine-based Catalysts: the shortest distance from Fe to the coordinating N atom ( $d_s$  in Å), binding energy and formation energy of catalysts ( $E_b$  in eV), and d-band center energy of Fe relative to the Fermi level ( $\epsilon_d$  in eV).

| Substrate | $d_s$ | $\Delta E_b^*$ | $E_{\text{fermi}}$ | $\epsilon_d$ |
|-----------|-------|----------------|--------------------|--------------|
| FePc      | 1.943 | 10.15          | -4.624             | -0.361       |
| FePc-FePc | 1.938 | 11.48          | -4.705             | -0.382       |
| FePc-CoPc | 1.939 | 11.05          | -4.700             | -0.452       |
| FePc-Pc   | 1.940 | 10.86          | -4.876             | -0.324       |

\* The  $\Delta E_b$  is calculated as follows:  $\Delta E_b = E_S + E_{\text{Fe}} - E_{\text{S-Fe}}$ , where the  $E_S$ ,  $E_{\text{Fe}}$ , and  $E_{\text{S-Fe}}$  are the total energies of substrate, isolated Fe atom, and , respectively. It notes that more positive  $\Delta E_b$  indicates high stability of catalysts.

**Table S2..** Formal charge, calculated Bader and net charges of Fe in catalysts. For assigning the formal oxidation state of Fe, Bader and net charges of Fe on catalysts are shown

|           | formal charges | Bader charge | net charge* |
|-----------|----------------|--------------|-------------|
| FePc      | +2             | 6.542        | 0.458       |
| FePc-FePc | +2             | 6.789        | 0.211       |
| FePc-CoPc | +2             | 6.347        | 0.653       |
| FePc-Pc   | +2             | 7.167        | -0.167      |

\* The net charge is obtained by the number of valence electrons in free Fe (7 e) minus the Bader charge.

**Table S3.** Free energy corrections. Computed zero-point energies (ZPE) and entropies multiplied by T (T = 298.15 k) (-TS) for adsorbed species.

| Species                           | $E_{ZPE}$ (eV) | $TS$ (eV) | $E_{ZPE} - TS$ (eV) |
|-----------------------------------|----------------|-----------|---------------------|
| Distal                            |                |           |                     |
| *N <sub>2</sub>                   | 0.200          | 0.187     | 0.013               |
| *N <sub>2</sub> H                 | 0.548          | 0.162     | 0.386               |
| *N <sub>2</sub> H <sub>2</sub>    | 0.968          | 0.229     | 0.739               |
| *N                                | 0.091          | 0.052     | 0.040               |
| *NH                               | 0.291          | 0.159     | 0.132               |
| *NH <sub>2</sub>                  | 0.607          | 0.198     | 0.409               |
| *NH <sub>3</sub>                  | 0.976          | 0.236     | 0.740               |
| Alternating                       |                |           |                     |
| *N <sub>2</sub>                   | 0.200          | 0.187     | 0.013               |
| *N <sub>2</sub> H                 | 0.548          | 0.162     | 0.386               |
| *NH-NH                            | 0.891          | 0.214     | 0.677               |
| *NH-NH <sub>2</sub>               | 1.110          | 0.218     | 0.892               |
| *NH <sub>2</sub> -NH <sub>2</sub> | 1.472          | 0.216     | 1.256               |
| *NH <sub>2</sub>                  | 0.607          | 0.198     | 0.409               |
| *NH <sub>3</sub>                  | 0.976          | 0.236     | 0.740               |

**Table S4.** Free energy changes (in eV) of all elementary steps for distal mechanism catalyzed on various considered substrates. Numbers in red indicate the maximum free energy barrier among all elementary steps.

| substrate | *→<br>*N-N | *N-N→<br>*N-NH | *N-NH→<br>*N-NH <sub>2</sub> | *N-NH <sub>2</sub> →<br>*N-NH <sub>3</sub> | *N-NH <sub>3</sub> →<br>*NH | *NH→<br>*NH <sub>2</sub> | *NH <sub>2</sub> →<br>*NH <sub>3</sub> | *NH <sub>3</sub> →<br>* |
|-----------|------------|----------------|------------------------------|--------------------------------------------|-----------------------------|--------------------------|----------------------------------------|-------------------------|
| FePc      | -0.538     | 1.57           | -0.370                       | 0.712                                      | -0.859                      | -1.084                   | -1.159                                 | 0.732                   |
| FePc-FePc | -0.570     | 1.468          | -0.139                       | 0.558                                      | -0.800                      | -0.210                   | -0.700                                 | -0.202                  |
| FePc-CoPc | -0.599     | 1.56           | -0.348                       | -1.239                                     | -0.936                      | -0.876                   | -0.098                                 | 1.53                    |
| FePc-Pc   | -0.465     | 0.794          | -0.475                       | 0.522                                      | -1.005                      | -0.305                   | -0.618                                 | 0.557                   |

**Table S5.** Free energy changes (in eV) of all elementary steps for the alternating mechanism catalyzed on various considered substrates. Numbers in red indicate the maximum free energy barrier among all elementary steps.

| substrate | *→<br>*N-N | *N-N→<br>*N-NH | *N-NH→<br>*NH-NH | *NH-NH→<br>*NH-NH <sub>2</sub> | *NH-NH <sub>2</sub> →<br>*NH <sub>2</sub> -NH <sub>2</sub> | *NH <sub>2</sub> -NH <sub>2</sub> →<br>*NH <sub>2</sub> | *NH <sub>2</sub> →<br>*NH <sub>3</sub> | *NH <sub>3</sub> →<br>* |
|-----------|------------|----------------|------------------|--------------------------------|------------------------------------------------------------|---------------------------------------------------------|----------------------------------------|-------------------------|
| FePc      | -0.538     | 1.571          | -0.343           | 0.183                          | -0.540                                                     | -0.9007                                                 | -1.1587                                | 0.7319                  |
| FePc-FePc | -0.570     | 1.468          | 0.357            | -0.627                         | -0.473                                                     | -0.158                                                  | -0.7000                                | -0.202                  |
| FePc-CoPc | -0.0.599   | 1.56           | -0.351           | 0.042                          | -0.052                                                     | -3.087                                                  | -0.098                                 | 1.53                    |
| FePc-Pc   | -0.465     | 0.794          | -0.423           | 0.130                          | -0.437                                                     | -0.533                                                  | -0.618                                 | 0.557                   |

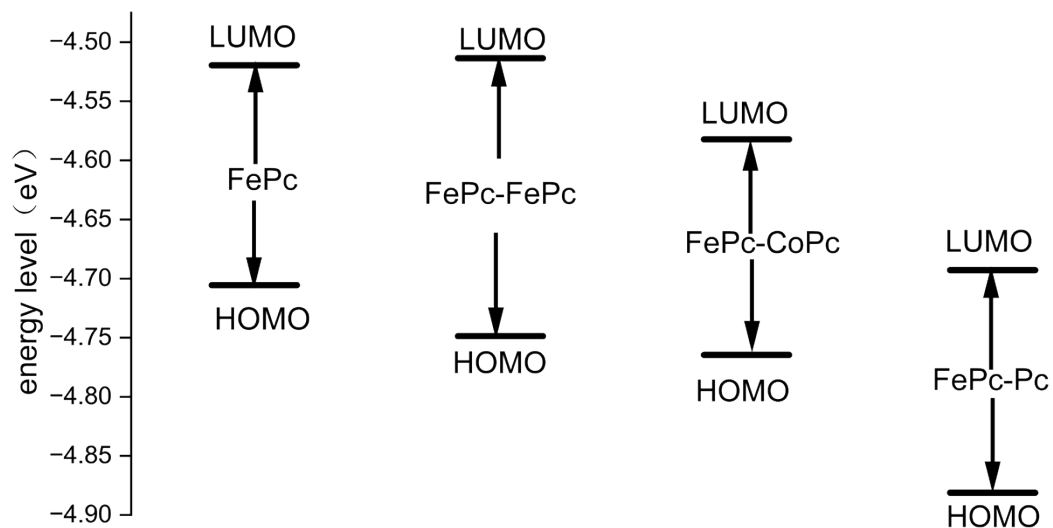

**Figure S1.** The calculated energies of the highest occupied molecular orbital (HOMO) and lowest unoccupied molecular orbital (LUMO), and HOMO–LUMO gaps for the studied catalyst.

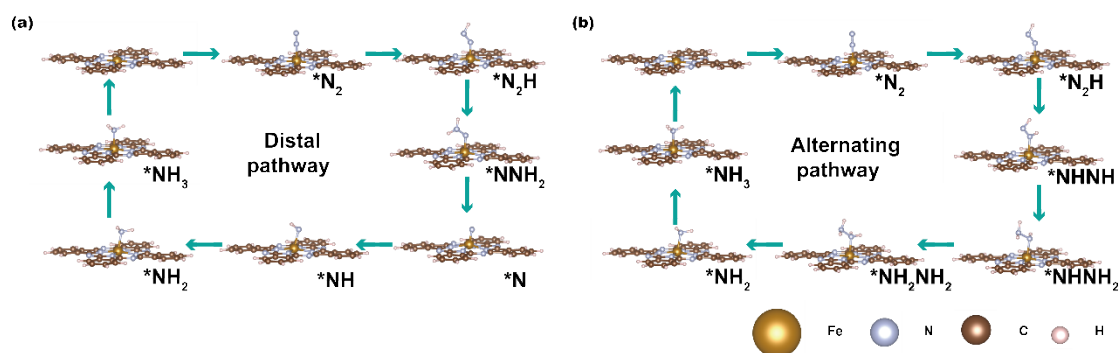

**Figure S2.** Configurations along the different reaction mechanisms of NRR on FePc.

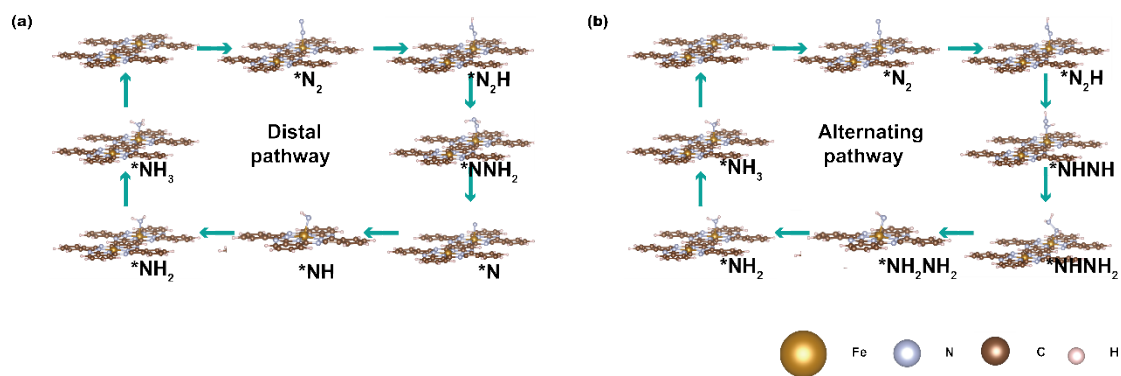

**Figure S3.** Configurations along the different reaction mechanisms of NRR on FePc-FePc.

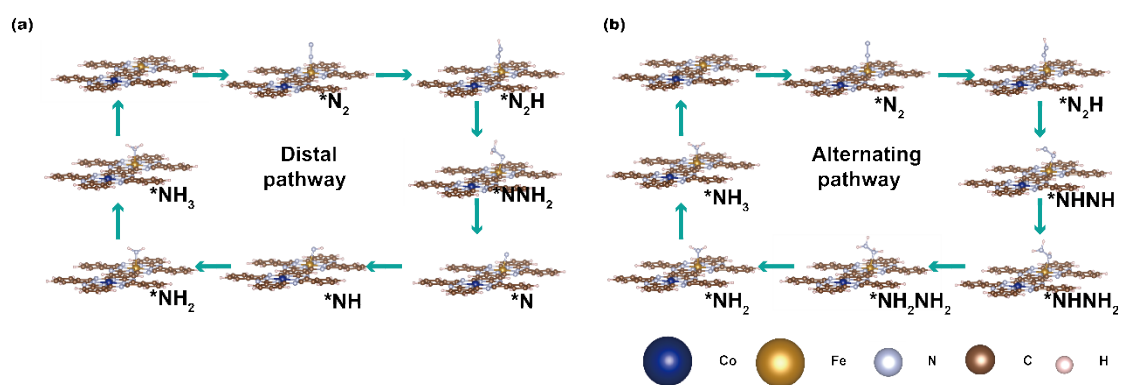

**Figure S4.** Configurations along the different reaction mechanisms of NRR on FePc-CoPc.

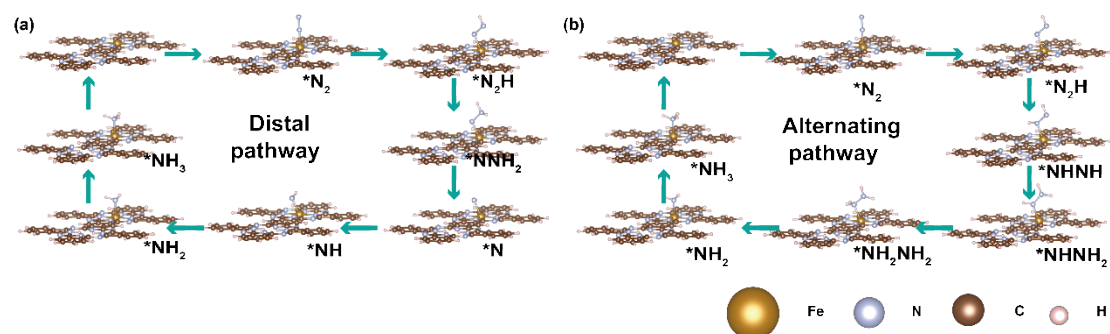

**Figure S5.** Configurations along the different reaction mechanisms of NRR on FePc-Pc.

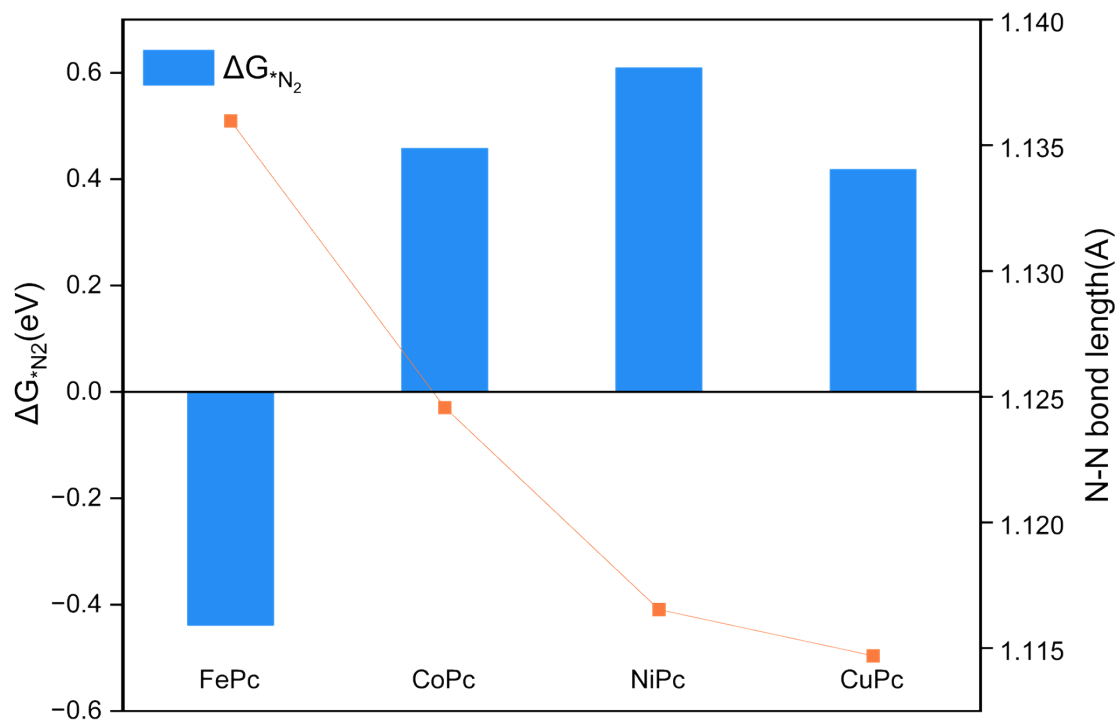

**Figure S6.** The Gibbs adsorption energy of  $N_2$  on common metal phthalocyanine molecular catalysts and the bond length of  $N_2$  molecules adsorbed on metal phthalocyanine.
